# Supplementary material
Source: PubMed Central journal article supplement (PMC4047988)

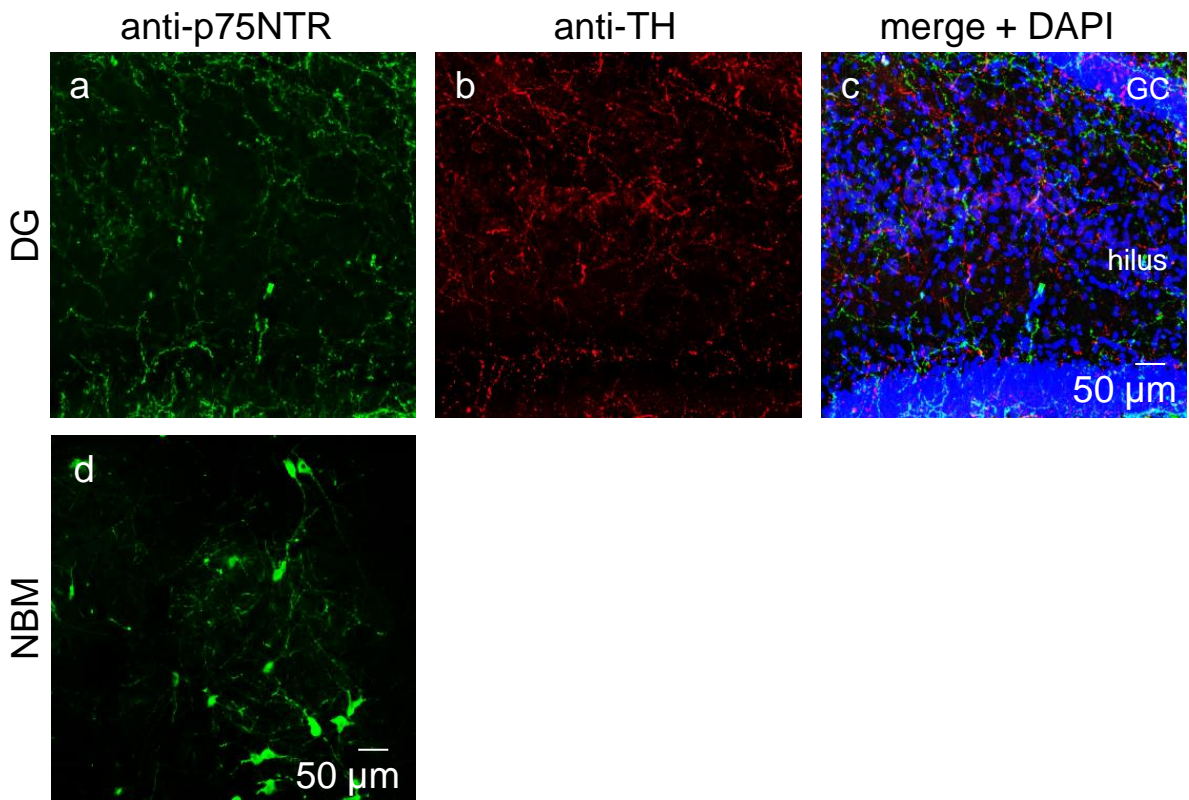

Supplementary Figure 1  
Nelson, Kolasa, and McMahon

Supplement: NIHMS586305-supplement-supplemental_1.pdf [file NIHMS586305-supplement-supplemental_1.pdf]

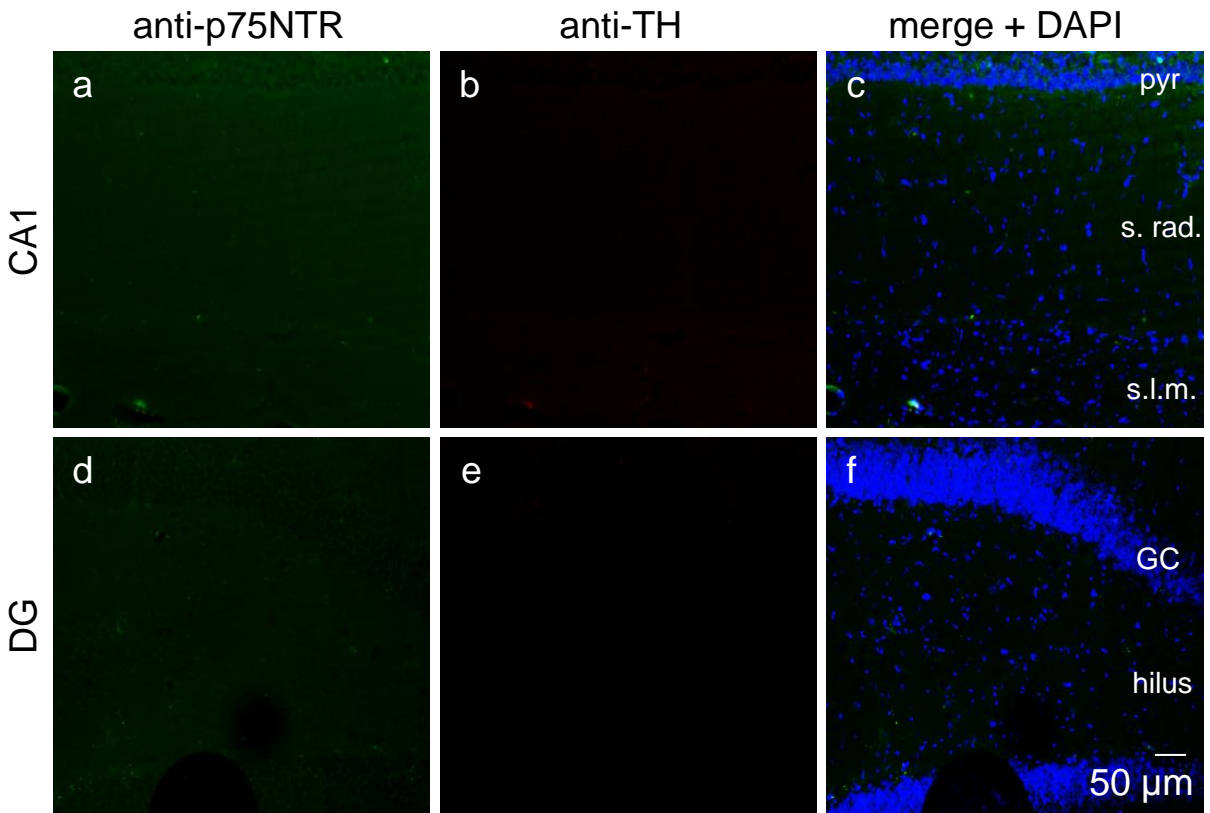

Supplementary Figure 2  
Nelson, Kolasa, and McMahon

Supplement: NIHMS586305-supplement-supplemental_2.pdf [file NIHMS586305-supplement-supplemental_2.pdf]
